# Supplementary material
Source: PubMed Central journal article supplement (PMC3209254)
Supplement: supp_31.22.4593_MCB5798-11_SF1_ST1.pdf [file supp_31.22.4593_MCB5798-11_SF1_ST1.pdf]

# Seo\_Supp\_Fig1

## A

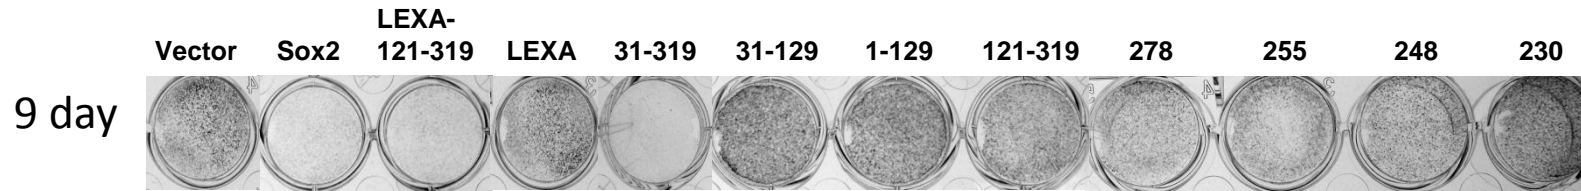

## B

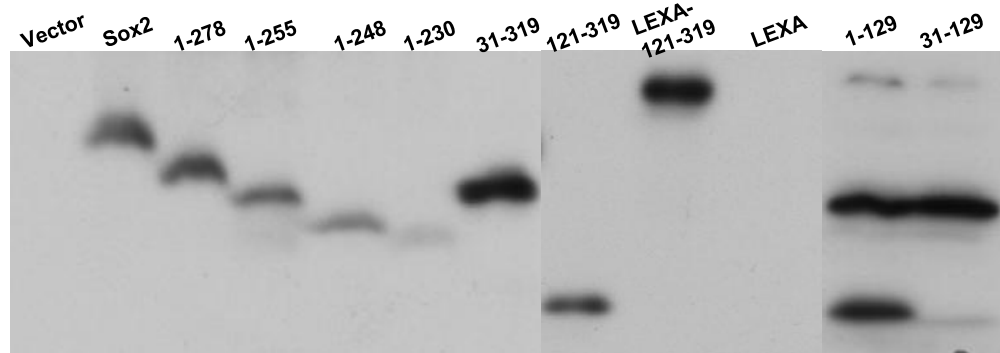

### S 1. Nuclear localized C-terminal domain of Sox2 is sufficient to block osteoblast differentiation.

**(A) Differentiation assay with mutants.** Primary calvarial osteoblasts were infected with empty vector, Sox2, or indicated mutants respectively and differentiated. Plates are shown at 9 days stained for alkaline phosphatase.

**(B) Western analysis.** Expression of Sox2 or mutants viral constructs in primary osteoblasts for 48h was verified by immunoblotting with antibodies against C-terminal or HMG region of Sox2.

# Seo\_Supp\_Table1

| Gene                 | Description                                                        | Entrez ID | FC FF (72 hr) | p-value  |      |
|----------------------|--------------------------------------------------------------------|-----------|---------------|----------|------|
| <b>Arid4b</b>        | AT rich interactive domain 4B (RBP1-like)                          | 94246     | 14.6          | 1.62E-06 | down |
| <b>Zfp281</b>        | zinc finger protein 281                                            | 226642    | 10.19         | 1.03E-04 | down |
| <b>SmarcaD1</b>      | SWI/SNK-related, matrix-associated                                 | 13990     | 9.9           | 4.41E-07 | down |
| <b>Ogt</b>           | O-linked N-acetylglucosamine (GlcNAc) transferase                  | 108155    | 9.1           | 5.79E-06 | down |
| <b>SkiL</b>          | ski-like                                                           | 20482     | 8.77          | 6.09E-06 | down |
| <b>Rasa1</b>         | ras p21 protein activator 1                                        | 218397    | 8.3           | 5.99E-06 | down |
| <b>Tnr6cA</b>        | trinucleotide repeat containing 6a                                 | 233833    | 8             | 2.18E-06 | down |
| <b>Cbx5</b>          | chromobox homolog 5 (Drosophila HP1a)                              | 12419     | 7.8           | 1.29E-06 | down |
| <b>Usp25</b>         | ubiquitin specific peptidase 25                                    | 30940     | 7.7           | 5.41E-05 | down |
| Bmi-1                | Bmi1 polycomb ring finger oncogene                                 | 12151     | 7.44          | 5.64E-05 | down |
| <b>Myst3</b>         | MYST histone acetyltransferase (monocytic leukemia) 3              | 244349    | 7.1           | 6.52E-06 | down |
| <b>eif4g2</b>        | eukaryotic translation initiation factor 4, gamma 2                | 13690     | 6.7           | 1.32E-05 | down |
| <b>Rbm39</b>         | RNA binding motif protein 39                                       | 170791    | 6.7           | 3.58E-05 | down |
| <b>2810474019Rik</b> | RIKEN cDNA 2810474019 gene                                         | 67246     | 6.5           | 0.001243 | down |
| <b>Bclaf1</b>        | BCL2-associated transcription factor 1                             | 72567     | 6.4           | 5.80E-05 | down |
| APC                  | adenomatosis polyposis coli                                        | 11789     | 6.3           | 1.96E-05 | down |
| <b>FoxP1</b>         | forkhead box P1                                                    | 108655    | 5.56          | 4.89E-06 | down |
| <b>Fam76b</b>        | family with sequence similarity 76                                 | 72826     | 5.2           | 1.39E-04 | down |
| <b>Arfgef1</b>       | ADP-ribosylation factor guanine nucleotide-exchange factor 1       | 211673    | 4.98          | 3.39E-05 | down |
| <b>D730040F13Rik</b> | RIKEN cDNA D730040F13 gene                                         | 242474    | 4.5           | 1.28E-04 | down |
| <b>Kpna3</b>         | karyopherin (importin) alpha 3                                     | 16648     | 4.4           | 3.39E-05 | down |
| <b>Ubr1</b>          | ubiquitin protein ligase E3 component n-recognin 1                 | 22222     | 4.1           | 6.67E-05 | down |
| <b>Huwe1</b>         | HECT, UBA and WWE domain containing 1                              | 59026     | 3.9           | 2.098185 | down |
| <b>Tia1</b>          | cytotoxic granule-associated RNA binding protein 1                 | 21841     | 3.5           | 3.05E-06 | down |
| <b>Sash1</b>         | SAM and SH3 domain containing 1                                    | 70097     | 3.4           | 2.91E-06 | down |
| <b>Pcf11</b>         | cleavage and polyadenylation factor subunit homolog                | 74737     | 3.2           | 3.58E-04 | down |
| <b>Kif11</b>         | kinesin family member 11                                           | 16551     | 3.2           | 1.26E-04 | down |
| <b>Gnai1</b>         | guanine nucleotide binding protein (G protein), alpha inhibiting 1 | 14677     | 2.8           | 0.001156 | down |
| <b>Jarid2</b>        | jumonji, AT rich interactive domain 2                              | 16468     | 2.7           | 0.003223 | down |
| <b>Rif1</b>          | Rap1 interacting factor 1 homolog (yeast)                          | 51869     | 2.5           | 2.14E-04 | down |
| <b>Zik1</b>          | zinc finger protein interacting with K protein 1                   | 22775     | 2.7           | 9.10E-05 | down |
| <b>Gsk3b</b>         | glycogen synthase kinase 3 beta                                    | 56637     | 2             | 0.002053 | down |
| Tug1                 | nc RNA, taurine upregulated gene 1                                 | 544752    | 20.54         | 8.75E-08 | down |
| Xist                 | nc RNA, inactive X-specific transcripts                            | 213742    | 9.15          | 1.609613 | down |
| Rock1                | rho associated colied-coil protein kinase 1                        | 19877     | 26.92         | 1.794977 | down |
| suz12                | suppressor of zeste 12 homolog (Drosophila)                        | 52615     | 8.12          | 2.545952 | down |
| wwp1                 | WW domain containing E3 ubiquitin protein ligase 1                 | 107568    | 15.69         | 5.31034  | down |
| KitL                 | kit ligand                                                         | 17311     | 2.14          | 0.002737 | down |
| Dcun1d1              | DCN1 defective in cullin neddylation 1, domain containing 1        | 114893    | 8.13          | 5.25E-04 | down |
| Dicer1               | Dicer, Dcr-1 homolog (Drosophila)                                  | 192119    | 2.96          | 4.254125 | down |
| <b>CTGF</b>          | connective tissue growth factor                                    | 14219     | 3.56          | 5.66E-06 | up   |
| <b>Arm6c6</b>        | armadillo repeat containing 6                                      | 76813     | 3.38          | 1.19E-05 | up   |
| <b>Zfp428</b>        | zinc finger protein 428                                            | 232969    | 2.82          | 4.04E-06 | up   |
| CxCl12               | chemokine (C-X-C motif) ligand 2                                   | 20310     | 2.32          | 1.882675 | up   |
| <b>Fzd2</b>          | frizzled homolog 2 (Drosophila)                                    | 57265     | 2.04          | 1.94E-04 | up   |

Table S1. Fold change of genes regulated by Sox2 in Sox2 flox/flox (FF) cells at 72 hours after Cre Infection that are also changed in Sox2 flox/- cell.. Genes in bold are defined as direct Sox2 targets by CHIP analysis in embryonic stem cells (9,13)
